# Supplementary material for: Outcomes valued by people living with dementia and their care partners: protocol for a qualitative systematic review and synthesis
Source: PubMed Central journal article supplement — BMJ Open. 2021 Aug 19;11(8):e050909. doi: 10.1136/bmjopen-2021-050909 (PMC8378359; doi:10.1136/bmjopen-2021-050909), 2021-08-19
Supplement: bmjopen-2021-050909supp001.pdf [file bmjopen-2021-050909supp001.pdf]

## Appendix 1: search strategy for Medline

|   | Searches                                                                                                                                                                                                                                                                                                                                                                                                                                                                                                                                                                                                           |
|---|--------------------------------------------------------------------------------------------------------------------------------------------------------------------------------------------------------------------------------------------------------------------------------------------------------------------------------------------------------------------------------------------------------------------------------------------------------------------------------------------------------------------------------------------------------------------------------------------------------------------|
| 1 | ((("semi-structured" or semistructured or unstructured or informal or indepth or "in-depth" or "face-to-face" or structured or guide) adj3 (interview* or discussion* or questionnaire*)) or ("focus group*" or qualitative or ethnograph* or fieldwork or "field work" or "key informant" or "grounded theory" or "phenomenol*" or narrative)).ti,ab. or "interviews as topic"/ or "focus groups"/ or narration/ or "qualitative research"/                                                                                                                                                                       |
| 2 | (Dement* or Alzheimer* or Lewy* or FTD or "Frontotemporal degenerat*" or "Frontotemporal disorder*" or "frontal temporal degenerat*" or "frontal temporal disorder*").mp. [mp=title, abstract, original title, name of substance word, subject heading word, floating sub-heading word, keyword heading word, organism supplementary concept word, protocol supplementary concept word, rare disease supplementary concept word, unique identifier, synonyms]                                                                                                                                                      |
| 3 | (Need* or Want* or Demand* or Domain* or Importan* or Wellbeing or "Well-being" or "well being" or "Quality of life" or "QoL" or Prefer* or Satisf* or impact* or View* or Outcome* or Hope* or coping or cope* or Expect*).mp. [mp=title, abstract, original title, name of substance word, subject heading word, floating sub-heading word, keyword heading word, organism supplementary concept word, protocol supplementary concept word, rare disease supplementary concept word, unique identifier, synonyms]                                                                                                |
| 4 | (Experience* or Meaning* or Perception* or Perceiv* or Understand* or subjectiv* or "Everyday li*" or "every day li*" or "every-day li*" or "day-to-day li*" or "day to day li*" or "daily li*" or Narrative* or Perspective* or Scheme* or Exist* or Representation* or Value* or Belief* or Identit* or Self* or selves).mp. [mp=title, abstract, original title, name of substance word, subject heading word, floating sub-heading word, keyword heading word, organism supplementary concept word, protocol supplementary concept word, rare disease supplementary concept word, unique identifier, synonyms] |
| 5 | 3 or 4                                                                                                                                                                                                                                                                                                                                                                                                                                                                                                                                                                                                             |
| 6 | 1 and 2 and 5                                                                                                                                                                                                                                                                                                                                                                                                                                                                                                                                                                                                      |

\*Planned limits included narrowing data search to studies conducted between 1990 and 2020, and including 'In-Process & Other Non-Indexed Citations' from Medline.

## Appendix 2: sources of grey literature to be included

| Type of grey literature                                                                        | Source type         | Sources                                                                                                                                                                                                                                                                                                     |
|------------------------------------------------------------------------------------------------|---------------------|-------------------------------------------------------------------------------------------------------------------------------------------------------------------------------------------------------------------------------------------------------------------------------------------------------------|
| Dementia strategies & guidelines (international)                                               | Websites            | alz.co.uk<br>alzheimer-europe.org<br>nice.org.uk<br>scie.org.uk<br>alzheimer.ca<br>alz.org<br>dementia.org.au                                                                                                                                                                                               |
| Theses, book chapters, conference proceedings, abstracts and conference papers (international) | Database search     | British Library Catalogue (bl.uk)                                                                                                                                                                                                                                                                           |
| Organisations of and for people living with dementia and care partners (UK)                    | Websites            | alzheimers.org.uk<br>dementiauk.org<br>youngdementia.uk.org<br>lewybody.org<br>raredementiasupport.org<br>dementiavoices.org.uk<br>Mentalhealth.org.uk<br>Carersuk.org                                                                                                                                      |
| Organisations of and for people living with dementia (international)                           | Websites            | alz.co.uk<br>alzheimer-europe.org<br>dementiaallianceinternational.org                                                                                                                                                                                                                                      |
| UK policy and consultations                                                                    | Websites            | gov.uk<br>gov.scot<br>gov.wales<br>northernireland.gov.uk                                                                                                                                                                                                                                                   |
| UK regulators                                                                                  | Websites            | Care Quality Commission                                                                                                                                                                                                                                                                                     |
| UK think tanks focusing on domestic policy                                                     | Websites<br>Reports | Centre for Health & the Public Interest<br>Demos<br>Health Foundation<br>Institute for Public Policy Research<br>Involve<br>Joseph Rowntree Foundation<br>The Kings Fund<br>National Centre for Social Research<br>Nesta<br>New Local Government Network<br>Nuffield Council on Bioethics<br>Nuffield Trust |

|  |  |                                                                                                                                                                                                                                         |
|--|--|-----------------------------------------------------------------------------------------------------------------------------------------------------------------------------------------------------------------------------------------|
|  |  | ResPublica ( <i>Care after Cure</i> )<br>Social Market Foundation<br>Wales Institute of Social &<br>Economic Research, Data and<br>Methods ( <i>Living well with<br/>dementia</i> )<br>The Work Foundation ( <i>care<br/>partners</i> ) |
|--|--|-----------------------------------------------------------------------------------------------------------------------------------------------------------------------------------------------------------------------------------------|
